# Supplementary material for: Unravelling the Role of Nitrogen in Surface Chemistry and Oxidation Evolution of Deep Cryogenic Treated High-Alloyed Ferrous Alloy
Source: MDPI journal article supplement (doi:10.3390/coatings12020213), 2022-02-06
Supplement: s1 [file s1]

Archive with 1 entries (1 files):
- coatings-1574519-supplementary.pdf
