# Supplementary material for: Unravelling the Role of Nitrogen in Surface Chemistry and Oxidation Evolution of Deep Cryogenic Treated High-Alloyed Ferrous Alloy
Source: MDPI journal article supplement (doi:10.3390/coatings12020213), 2022-02-06
Supplement: s1 [file s1 › coatings-1574519-supplementary.pdf]

# Supplementary Materials: Unravelling the Role of Nitrogen in Surface Chemistry and Oxidation Evolution of Deep Cryogenic Treated High-Alloyed Ferrous Alloy

Patricia Jovičević-Klug <sup>1,2,\*</sup>, Matic Jovičević-Klug <sup>2,3</sup> and Bojan Podgornik <sup>1,2</sup>

<sup>1</sup> Department, Institute of Metals and Technology, Lepi pot 11, 1000 Ljubljana, Slovenia; bojan.podgornik@imt.si

<sup>2</sup> Department, Jožef Stefan International Postgraduate School, Jamova cesta 39, 1000 Ljubljana, Slovenia; m.jovicevic-klug@mpie.de

<sup>3</sup> Department, Max Planck Institute for Iron Research, Max-Planck-Straße 1, 40237 Düsseldorf, Germany

\* Correspondence: patricia.jovicevicklug@imt.si; Tel.: +386-14701-990

**Table S1.** Electrochemical parameters, deduced from potentiodynamic curves and liner polarization measurements by Voglar et al. 2021 [1].

| Steel Grade | Subgroups | Ecorr (V) | Rp (kΩ cm <sup>2</sup> )* | DCT effect |
|-------------|-----------|-----------|---------------------------|------------|
| AISI M35    | CHT       | −0.316    | 177                       | ↑          |
|             | DCT       | −0.304    | 227                       |            |

\*The value is deduced from linear polarization measurements; scan rate was 0.1 mV·s<sup>−1</sup>.

**Citation:** Jovičević-Klug, P.; Jovičević-Klug, M.; Podgornik, B. Unravelling the Role of Nitrogen in Surface Chemistry and Oxidation Evolution of Deep Cryogenic Treated High-alloyed Ferrous Alloy. *Coatings* **2022**, *12*, 213. <https://doi.org/10.3390/coatings12020213>

Academic Editor:  
Francesco Di Quarto

Received: 12 January 2022

Accepted: 4 February 2022

Published: 6 February 2022

**Publisher's Note:** MDPI stays neutral with regard to jurisdictional claims in published maps and institutional affiliations.

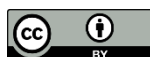

**Copyright:** © 2022 by the authors. Licensee MDPI, Basel, Switzerland. This article is an open access article distributed under the terms and conditions of the Creative Commons Attribution (CC BY) license (<https://creativecommons.org/licenses/by/4.0/>).

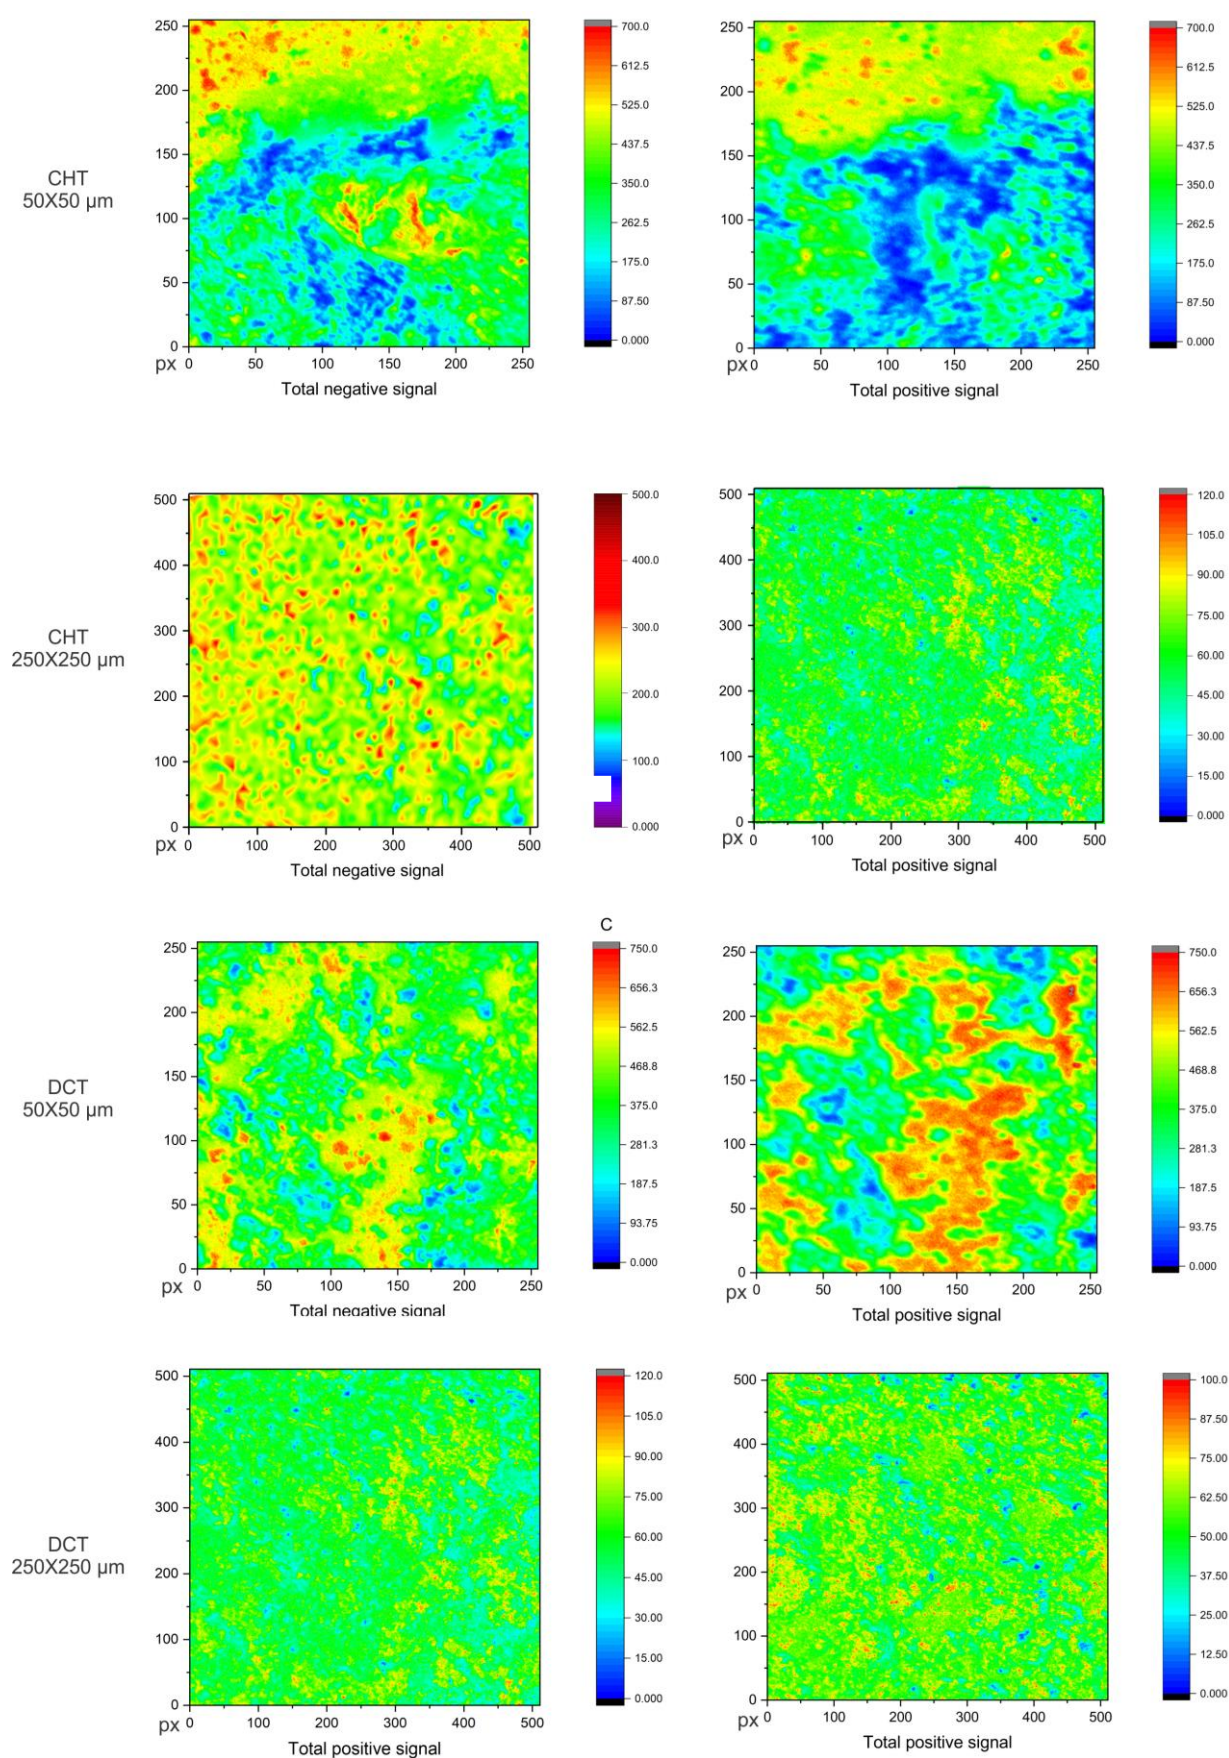

**Figure S1.** ToF-SIMS results for total-ion signal for positive and negative signal for all investigated samples.

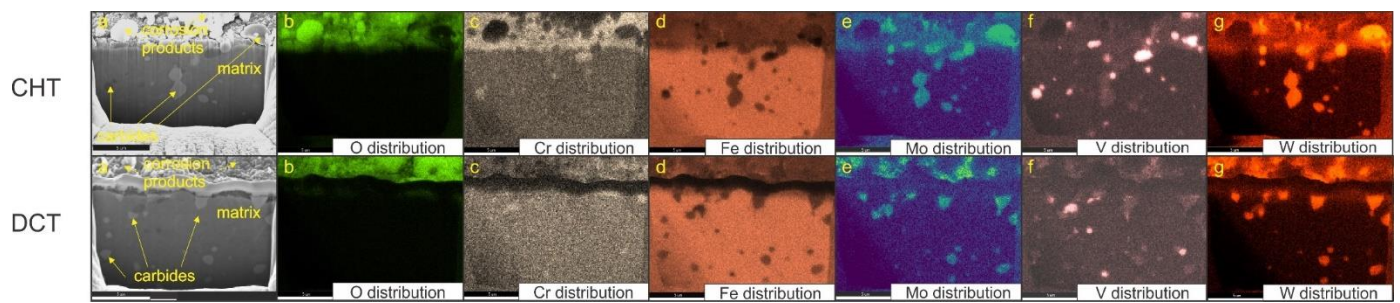

**Figure S2.** EDX mapping of cut samples results of alloying elements and oxygen in both conventionally (CHT) and deep cryogenic heat-treated samples (DCT) of selected AISI M35.
